# Supplementary material for: Predictors of Transition Shock Among Newly Graduated Nurses, Sri Lanka: A Descriptive Cross- Sectional Study on the Roles of Self-Efficacy, Professional Nursing Values, and Practice Environment
Source: Research Square preprint supplement (doi:10.21203/rs.3.rs-7362651/v1), 2025-09-18
Supplement: Supplementary file 1 [file 3e4a06d24de6dd253fcfc0bf.docx]

Supplementary table S1- Frequency distribution of Socio-demographic, Pre-graduation, and Working Characteristics

| **Variable** | **Category** | **Count** | **Percentage (%)** |
| --- | --- | --- | --- |
| Age (years) | 24 | 3 | 2.90% |
| 25 | 9 | 8.80% |
| 26 | 24 | 23.50% |
| 27 | 33 | 32.40% |
| 28 | 21 | 20.60% |
| 28< | 12 | 11.80% |
| Gender | Female | 67 | 65.70% |
| Male | 35 | 34.30% |
| Marital Status | Single | 90 | 88.20% |
| Married | 12 | 11.80% |
| Living arrangement | With parents | 24 | 23.50% |
| At the hospital nursing quarters | 60 | 58.80% |
| At a boarding place | 15 | 14.70% |
| Married and moved out | 3 | 2.90% |
| Level of nursing education | Bachelor’s degree | 86 | 84.30% |
| Engaged in an M.Sc program | 15 | 14.70% |
| Engaged in an MPhil program | 1 | 1.00% |
| The university at which you earned your Bachelor degree is | University of Sri Jayewardenepura | 19 | 18.60% |
| University of Ruhuna | 12 | 11.80% |
| University of Jaffna | 3 | 2.90% |
| University of Peradeniya | 34 | 33.30% |
| Eastern University | 14 | 13.70% |
| General Sir John Kotelawala Defence University | 20 | 19.60% |
| GPA categories | <3.5 | 98 | 96.10% |
| ≥3.5 | 4 | 3.90% |
| Reason for choosing to follow the Bachelor of Nursing program at a University (R) | Genuinely had the dream of becoming a nurse one day (R1) | 18 | 17.60% |
| Make a real difference by helping the people in need (R2) | 18 | 17.60% |
| Direct employment opportunity in Sri Lanka (R3) | 7 | 6.90% |
| The Z-Score at GCE A/L was not high enough to follow any other majors (R4) | 28 | 27.50% |
| High demand for recruitment from overseas (R5) | 18 | 17.60% |
| Wanted to be academically qualified with a degree from a recognized university in Sri Lanka (R6) | 5 | 4.90% |
| Other (R7) | 8 | 7.80% |
| Reason for deciding to be a ‘staff nurse’ after obtaining the degree (R0) | Did not see any other pathways except for becoming a staff nurse (R8) | 18 | 17.60% |
| Genuinely wanted to be a professional staff nurse and serve the community (R9) | 18 | 17.60% |
| Availability of career advancement (Wanted to go up the ladder of hierarchy) (R10) | 7 | 6.90% |
| To obtain clinical experience that is necessary to apply for employment overseas (R11) | 28 | 27.50% |
| To obtain clinical experience that is necessary to apply/ in order to pursue further higher education in SL or Overseas (R12) | 18 | 17.60% |
| Became a staff nurse expecting a high monthly wage (R13) | 5 | 4.90% |
| Other (R14) | 8 | 7.80% |
| Type of hospital | Government | 59 | 57.80% |
| Semi-government | 12 | 11.80% |
| Private | 31 | 30.40% |
| Number of beds in the hospital (Bed strength) | Less than 250 | 18 | 17.60% |
| 250-500 | 28 | 27.50% |
| 500-1000 | 36 | 35.30% |
| 1000-1500 | 8 | 7.80% |
| 1500-2000 | 8 | 7.80% |
| Greater than 2000 | 4 | 3.90% |
| 20,000 LKR - 30,000 LKR | 4 | 3.90% |
| 30,000 LKR - 40,000 LKR | 20 | 19.60% |
| 40,000 LKR - 50,000 LKR | 33 | 32.40% |
| 50,000 LKR - 60,000 LKR | 22 | 21.60% |
| 60,000 LKR - 70,000 LKR | 16 | 15.70% |
| 70,000 LKR - 80,000 LKR | 4 | 3.90% |
| Greater than 80,000 LKR | 3 | 2.90% |
| Pre-education within the hospital? | No | 70 | 68.60% |
| Yes | 32 | 31.40% |
| Trained/ currently training with a *Preceptor? | No | 74 | 72.50% |
| Yes | 28 | 27.50% |

Supplementary table S2 – Scales and their significant associations

|  | **GSE** | **PNV** | **PESNWI** | **TS** |
| --- | --- | --- | --- | --- |
| **Variable** | **ANOVA (between groups) significance / t-tests/ Levene statistics (Significance based on Mean)/ Robust test of Equality of Means/ Post-Hoc Comparisons(where appropriate) (At 95% confidence level)** | | | |
| **Gender** |  |  | Gender (Mean =2.7643, SD = 0.41085) and PESNWI (Mean = 2.5300, SD = 0.58579) at conditions; t (51.951) = 2.110, p= 0.040 |  |
| **Reason for deciding to be a nurse after obtaining the degree (Seven Reasons: R8 to R14)** |  | On the PNV score for the seven reasons (R) stated [F= (6, 95) = 2.317,  *p* = 0.039]. Post Hoc Comparisons-The difference in means between R9; Genuinely wanted to be a professional staff nurse and serve the community, and R14; Other (p = 0.014) | On the PESNWI score for the seven reasons (R) stated. [F= (6, 95) = 2.290, p = 0.042]. | On the TS score for the seven reasons (R) stated [F= (6, 95) = 4.600, p = 0.000]. Post Hoc Comparisons- The difference in means between R8; Did not see any other pathways except for becoming a nurse, and R9; Genuinely wanted to be a professional nurse and serve the community (p = 0.001). The difference in means between R9; Genuinely wanted to be a professional nurse and serve the community, and R11; To obtain the clinical experience necessary to apply for employment overseas (p = 0.007). |
| **Type of Hospital (H) - Government (G), Semi-government (SG), Private (P)** | On the GSE score for the three types of hospitals (G, SG and P) [F (2, 99) = 4.411, p = 0.015] |  |  | On the TS score for the three types of hospitals (G, SG and P) [F (2, 99) = 4.366, p = 0.015]. Post Hoc Comparisons- The difference in means between G and SG hospitals (p = 0.018) , and between P and SG (p = 0.017). |
| **Bed Strengths (Six categories: BS1 to BS6)** |  |  |  | On the TS score for the six categories of Bed Strengths (BS1 to BS6) [F (5, 96) = 2.801, p = 0.021]. |
| **Monthly Income (Seven categories: I1 to I7)** |  | On the PNV score for the seven categories of Income (I1 to I7) [F (6, 95) = 2.406, p = 0.033]. |  | On the TS score for the seven categories of Income (I1 to I7) [F (6, 95) = 3.307, p = 0.005] |
| **Trained/Currently training with a preceptor at the hospital'/ 'Pre-education within the hospital.'** | Significant difference in the scores for 'Trained/Currently training with a preceptor at the hospital' (Mean =2.8000, SD = 0.65187) and GSE (Mean = 2.4750, SD = 0.74616) at conditions; t (100) = 2.158, p = 0.033 | Significant difference in the scores for 'Pre-education within the hospital' (Mean =3.6961, SD = 0.53185) and PNV (Mean = 3.9488, SD = 0.38705) at conditions; t (99) = -2.379, p = 0.019 | Significant difference in the scores for 'Pre-education within the hospital' (Mean =2.5695, SD = 0.45265) and PESNWI (Mean = 2.9388, SD = 0.48265) at conditions; t (99) = -3.706, p = 0.000 |  |
